# Supplementary material
Source: MDPI journal article supplement (https://www.mdpi.com/2071-1050/13/4/2408)
Supplement: s1 [file s1]

# Dendrohydrological reconstructions based on tree-ring width (TRW) chronologies of narrow-leaved ash in the Sava River basin (Croatia)

Domagoj Trlin <sup>1,\*</sup>, Stjepan Mikac <sup>1</sup>, Anja Žmegač <sup>1</sup> and Marko Orešković <sup>1</sup>

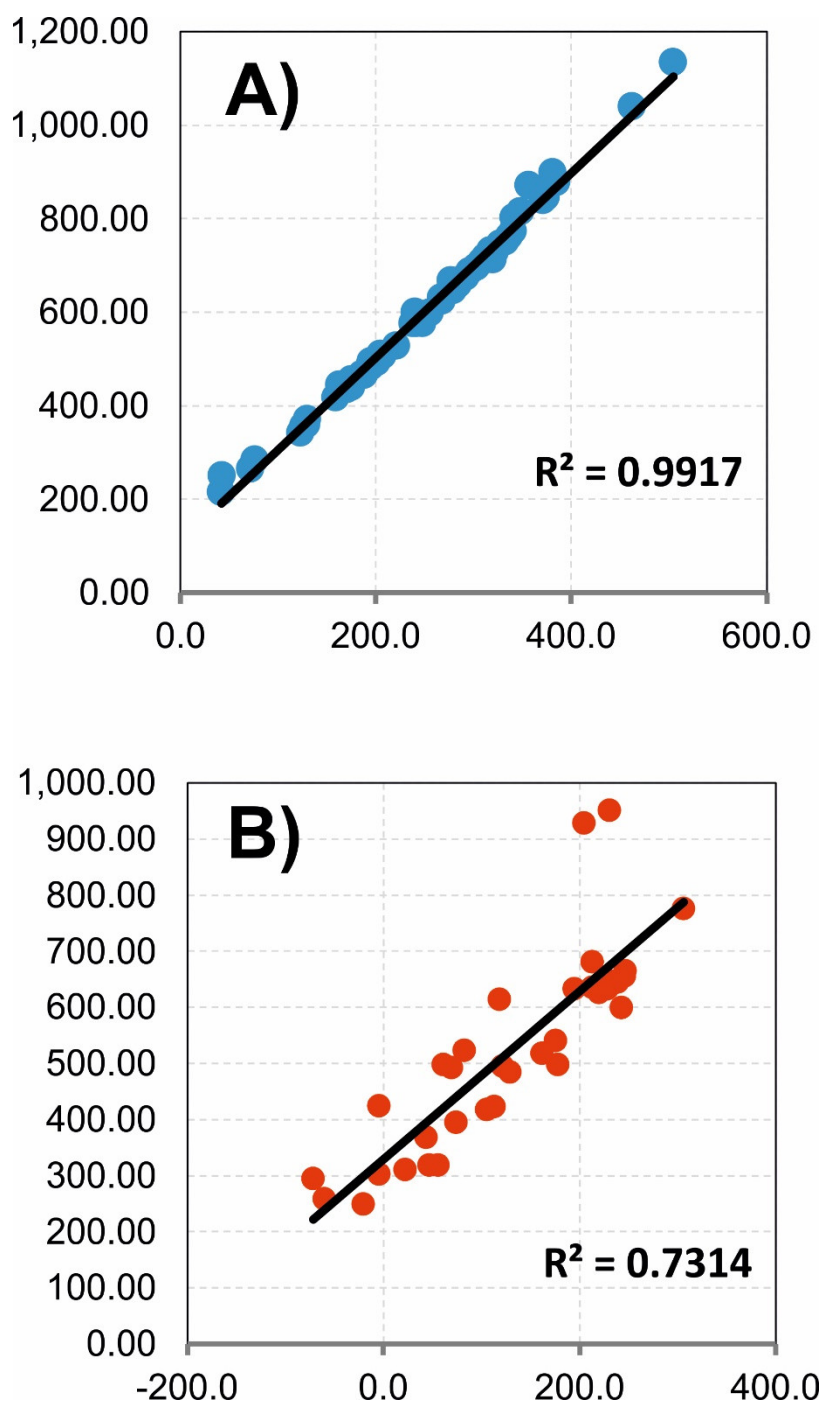

**Figure S1.** Reliance of streamflow on water level prior to 1980 (A) and after 1980 (B).
